# Supplementary material
Source: Springer Nature journal article supplement (https://www.springermedizin.de/resource/supplementary/12955_2008_544_MOESM2_ESM.pdf/9560670)

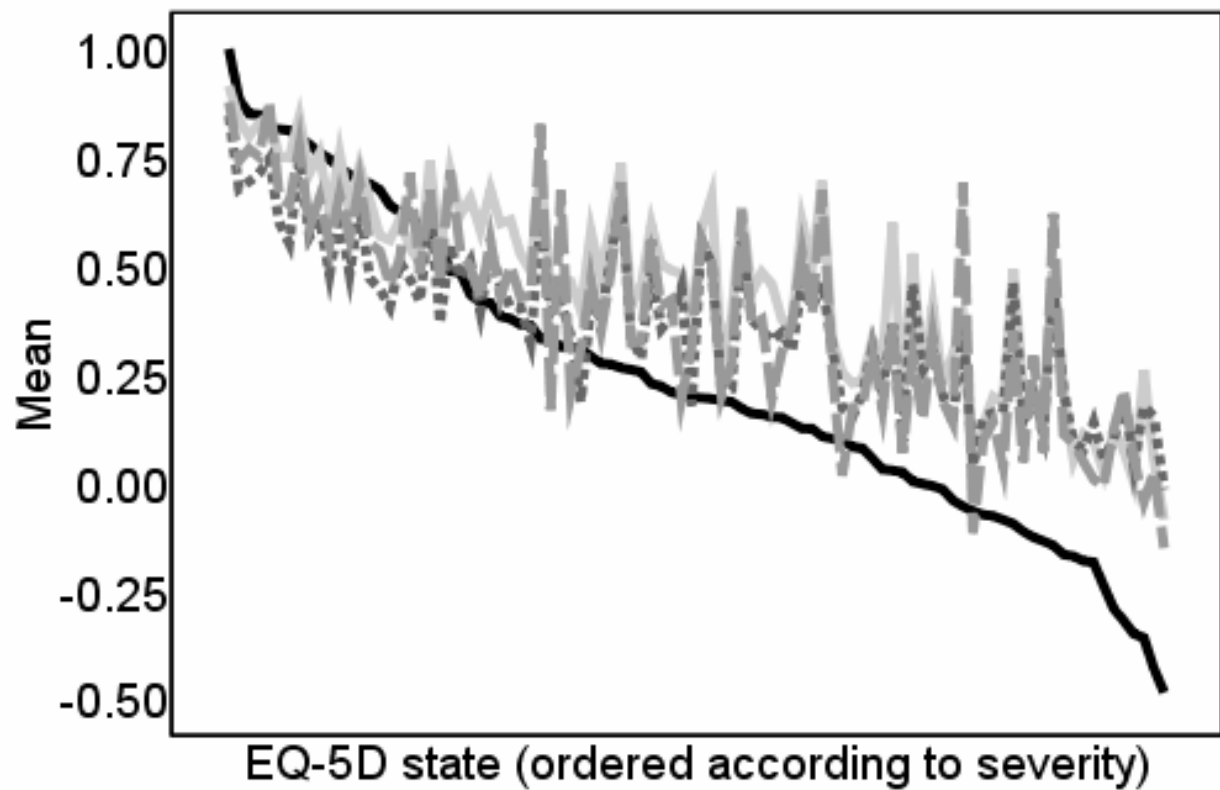

Supplement: MOESM2 [file 9560670]
